# Supplementary figures and images for: Unveiling the mechanisms of immune evasion in pancreatic cancer: may it be a systemic inflammation responsible for dismal survival?
Source: Springer Nature journal article supplement (doi:10.1007/s12094-019-02113-y), 2019-04-19

Figure S1. ROC curves for NLR and ELR (n=66).


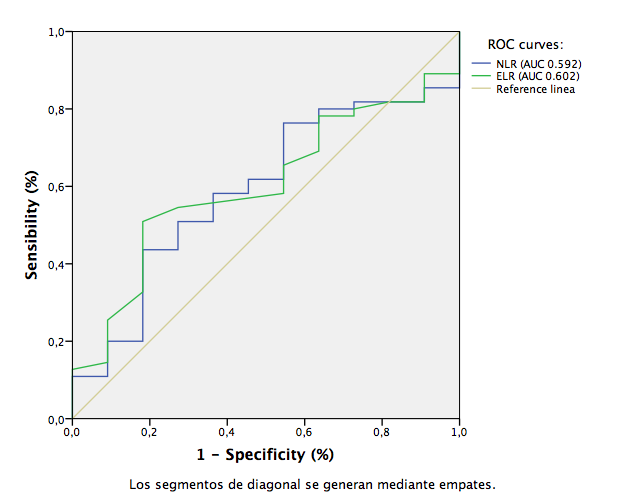

Supplement: MOESM1 [file 16666376]
